# Supplementary material for: Hydrophobicity-guided self-assembled particles of silver nanoclusters with aggregation-induced emission and their use in sensing and bioimaging
Source: Royal Society of Chemistry journal article supplement (doi:10.1039/c8tb00463c), 2018-01-01
Supplement: c8tb00463c1.pdf [file c8tb00463c1.pdf]

## Electronic Supplementary Information *for*

### Hydrophobicity-Guided Self-Assembled Particles of Silver Nanoclusters with Aggregation-Induced Emission and Their Use in Sensing and Bioimaging

Saifei Pan,<sup>a†</sup> Weidong Liu,<sup>a†</sup> Jiantao Tang,<sup>a</sup> Yingjie Yang,<sup>a</sup> Hui Feng,<sup>a</sup> Zhaosheng Qian<sup>a\*</sup> and Jin Zhou<sup>b\*</sup>

<sup>†</sup> These authors contributed to this work equally.

\* Corresponding author. E-mail: qianzhaosheng@zjnu.cn; Tel. & Fax. +86-579-82282269.

College of Chemistry and Life Science, Zhejiang Normal University, Jinhua 321004, China

1. **Figure S1.** PL spectra of silver nanoclusters synthesized using different ratios of thiosalicylic acid to silver ion from 1:1 to 1:8.
2. **Figure S2.** Time-resolved luminescence decay curve of AgNCs dispersion in ethanol, AgNC AIE particles and AgNCs powder and their corresponding fit curves.
3. **Figure S3.** PL spectra of AgNC AIE particles assembled in solutions with different ratios of ethanol to water.
4. **Figure S4.** PL spectra of AgNC AIE particles assembled in water with different ultrasonic time from 10 min to 70 min.
5. **Figure S5.** Calibration curve between luminescence intensity of AgNC AIE particles and solution temperature in the range of 0.0 – 80.0 °C.
6. **Figure S6.** Time-resolved luminescence decay curves of AgNC AIE particles at different temperatures ranging from 0.0 – 80.0 °C with the interval of 10 °C.
7. **Figure S7.** Effect of thiosalicylic acid on the viability of human A549 cells.

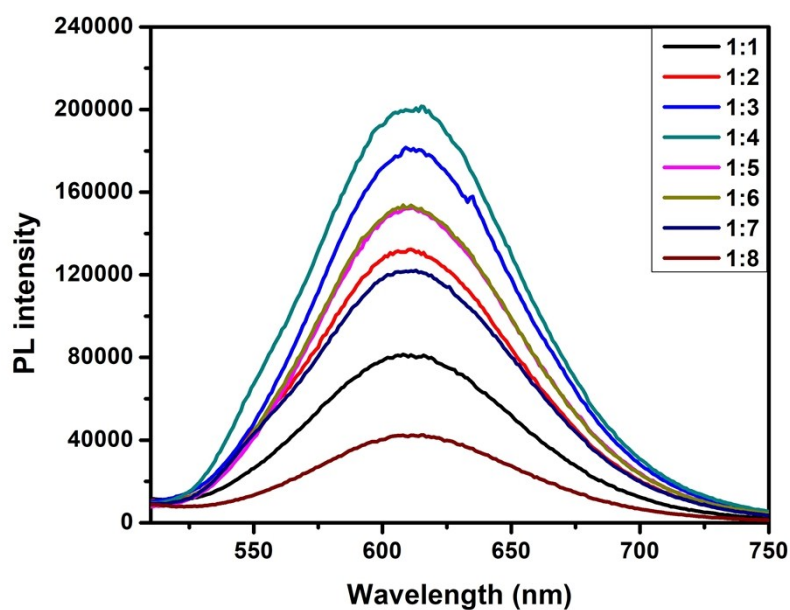

**Figure S1.** PL spectra of silver nanoclusters synthesized using different ratios of thiosalicylic acid to silver ion from 1:1 to 1:8.

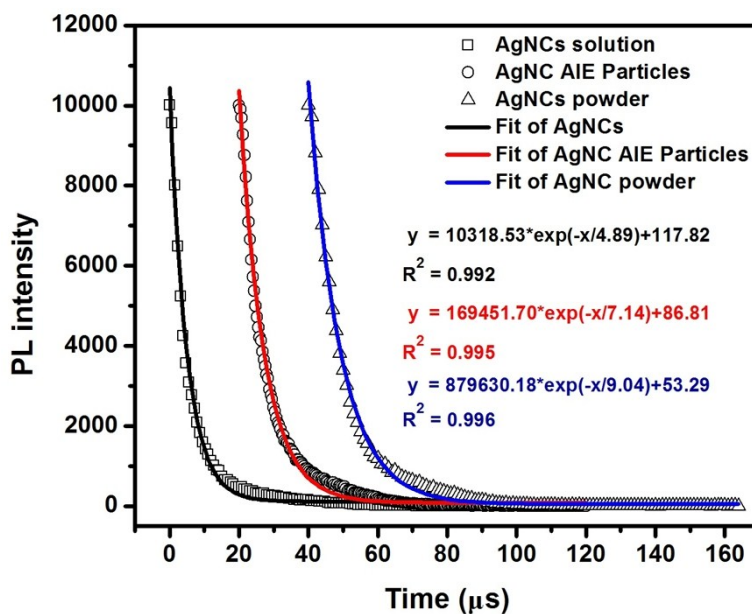

**Figure S2.** Time-resolved luminescence decay curve of AgNCs dispersion in ethanol, AgNC AIE particles and AgNCs powder and their corresponding fit curves.

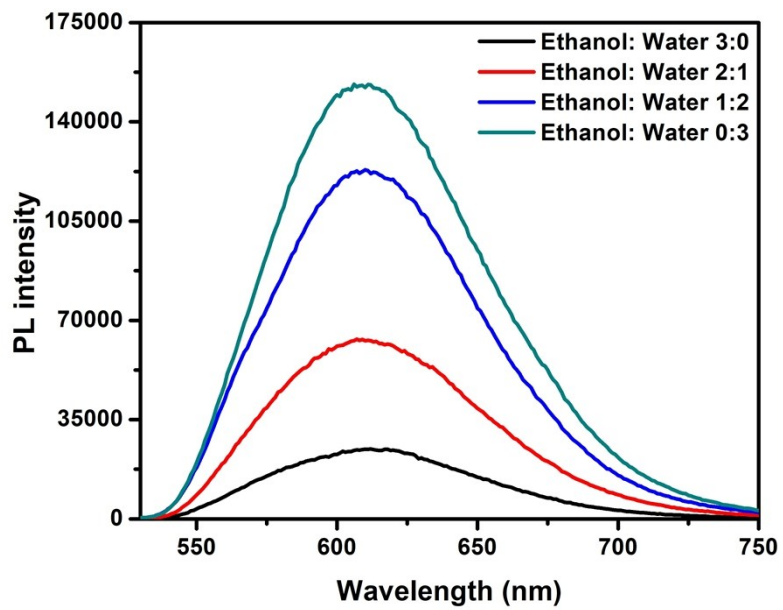

**Figure S3.** PL spectra of AgNC AIE particles assembled in solutions with different ratios of ethanol to water.

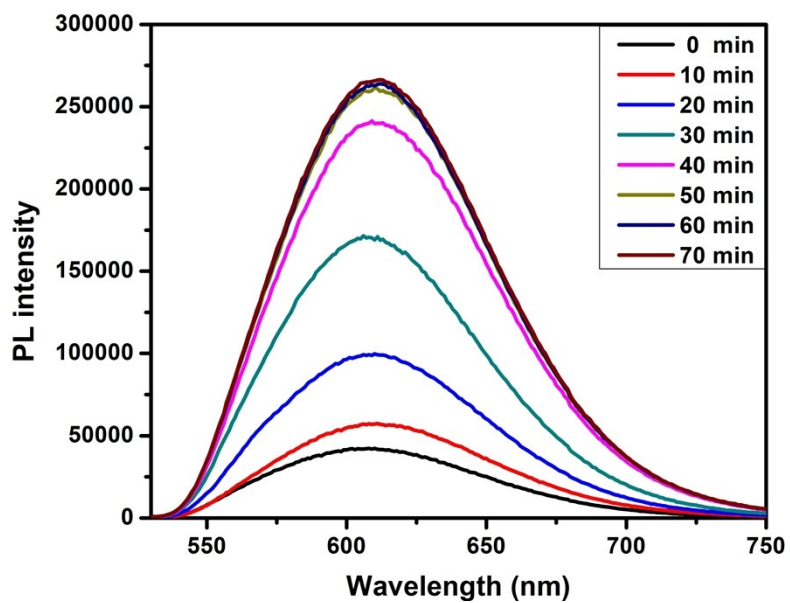

**Figure S4.** PL spectra of AgNC AIE particles assembled in water with different ultrasonic time from 0 min to 70 min.

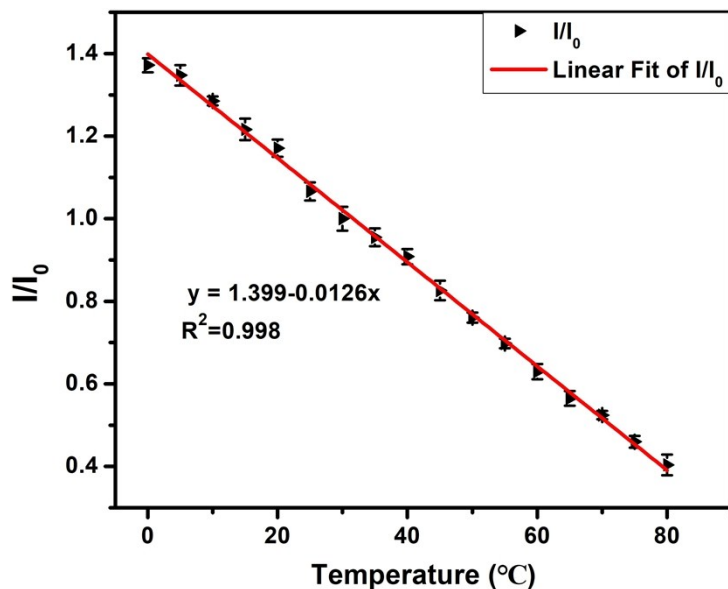

**Figure S5.** Calibration curve between luminescence intensity of AgNC AIE particles and solution temperature in the range of 0.0 – 80.0  $^{\circ}\text{C}$ .

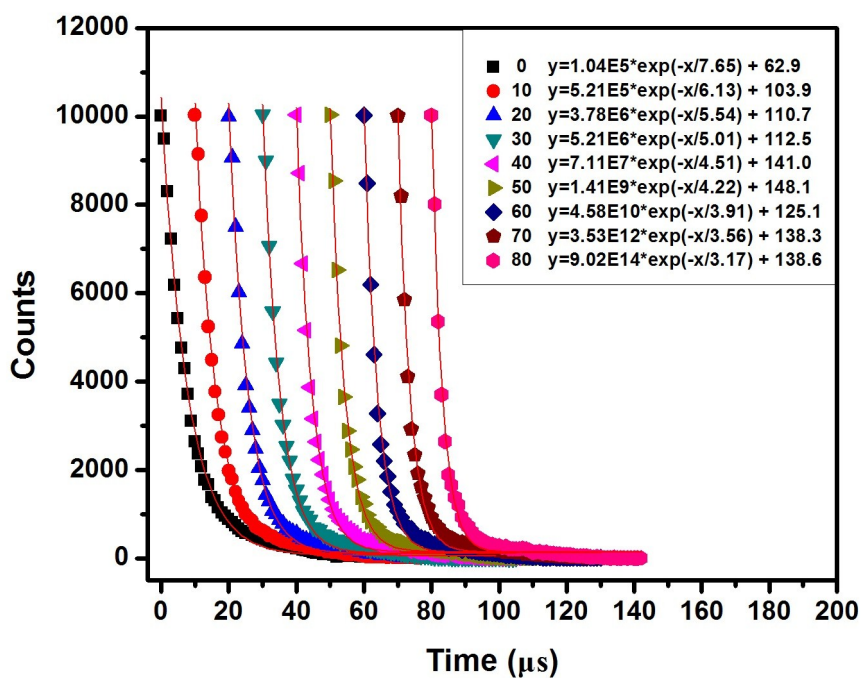

**Figure S6.** Time-resolved luminescence decay curves of AgNC AIE particles at different temperatures ranging from 0.0 – 80.0  $^{\circ}\text{C}$  with the interval of 10  $^{\circ}\text{C}$ . The lifetimes at these temperatures are determined to be 7.65, 6.13, 5.54, 5.01, 4.51, 4.22, 3.91, 3.56 and 3.17  $\mu\text{s}$ , respectively.

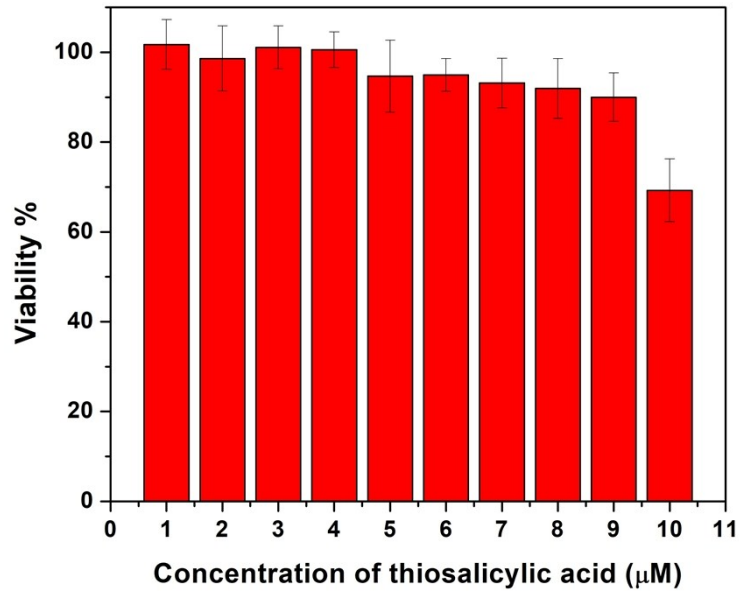

**Figure S7.** Effect of thiosalicylic acid on the viability of human A549 cells.
